# Supplementary material
Source: publisher site journal article supplement (https://www.spandidos-publications.com/6393/downloadSupplementary)
Supplement: Supplementary file 1 [file downloadSupplementary]

## Sheet: Sheet1
Table SIII. Metabolic pathways and unigene number between the patients with alcohol-induced osteonecrosis of the femoral head and negative controls according to Kyoto Encyclopedia of Genes and Genomes analysis.
Pathway entry	Pathway definition	S Unigene number	TS Unigene number	B Unigene number	TB Unigene number	P-value
map02040	Flagellar assembly	98	12977	963	193896	3.0384e-05
map02030	Bacterial chemotaxis	105	12977	1067	193896	6.22859e-05
map00040	Pentose and glucuronate interconversions	128	12977	1375	193896	0.00012621
map00053	Ascorbate and aldarate metabolism	49	12977	434	193896	0.000269739
map00791	Atrazine degradation	6	12977	19	193896	0.00113753
map00480	Glutathione metabolism	80	12977	847	193896	0.00137434
map03018	RNA degradation	161	12977	1916	193896	0.00203003
map05133	Pertussis	4	12977	11	193896	0.0045159
map00500	Starch and sucrose metabolism	321	12977	4165	193896	0.0050937
map00460	Cyanoamino acid metabolism	82	12977	938	193896	0.00890331
map00591	Linoleic acid metabolism	2	12977	3	193896	0.0128375
map00590	Arachidonic acid metabolism	7	12977	40	193896	0.0158617
map00190	Oxidative phosphorylation	224	12977	2927	193896	0.0213973
map00920	Sulfur metabolism	98	12977	1212	193896	0.0320938
map03420	Nucleotide excision repair	140	12977	1793	193896	0.03429
map00984	Steroid degradation	2	12977	5	193896	0.0390908
map00562	Inositol phosphate metabolism	40	12977	455	193896	0.0488993
map00071	Fatty acid degradation	60	12977	721	193896	0.0500325
map00310	Lysine degradation	45	12977	525	193896	0.0547124
map00331	Clavulanic acid biosynthesis	1	12977	1	193896	0.0669276
map04112	Cell cycle - Caulobacter	1	12977	1	193896	0.0669276
map05132	Salmonella infection	1	12977	1	193896	0.0669276
map00520	Amino sugar and nucleotide sugar metabolism	324	12977	4468	193896	0.0704494
map00564	Glycerophospholipid metabolism	97	12977	1254	193896	0.079237
map00565	Ether lipid metabolism	3	12977	16	193896	0.0872515
map00670	One carbon pool by folate	128	12977	1697	193896	0.0888671
map02025	Biofilm formation - Pseudomonas aeruginosa	9	12977	83	193896	0.102902
map00440	Phosphonate and phosphinate metabolism	14	12977	146	193896	0.111741
map00010	Glycolysis / Gluconeogenesis	304	12977	4252	193896	0.120753
map00260	Glycine, serine and threonine metabolism	184	12977	2525	193896	0.123163
map00072	Synthesis and degradation of ketone bodies	4	12977	29	193896	0.125765
map01200	Carbon metabolism	612	12977	8750	193896	0.128904
map00362	Benzoate degradation	48	12977	606	193896	0.130284
map00524	Neomycin, kanamycin and gentamicin biosynthesis	4	12977	30	193896	0.137871
map02020	Two-component system	619	12977	8874	193896	0.142686
map01110	Biosynthesis of secondary metabolites	1906	12977	27860	193896	0.144749
map05100	Bacterial invasion of epithelial cells	6	12977	54	193896	0.15101
map00280	Valine, leucine and isoleucine degradation	65	12977	863	193896	0.177813
map00380	Tryptophan metabolism	29	12977	363	193896	0.186346
map00253	Tetracycline biosynthesis	1	12977	3	193896	0.187646
map00062	Fatty acid elongation	1	12977	3	193896	0.187646
map00541	O-Antigen nucleotide sugar biosynthesis	128	12977	1781	193896	0.213024
map00680	Methane metabolism	184	12977	2599	193896	0.223657
map01212	Fatty acid metabolism	116	12977	1622	193896	0.241905
map05130	Pathogenic Escherichia coli infection	1	12977	4	193896	0.242015
map04122	Sulfur relay system	56	12977	759	193896	0.243392
map00473	D-Alanine metabolism	21	12977	266	193896	0.247543
map00930	Caprolactam degradation	7	12977	77	193896	0.256
map00760	Nicotinate and nicotinamide metabolism	105	12977	1470	193896	0.25798
map00730	Thiamine metabolism	92	12977	1288	193896	0.273276
map01053	Biosynthesis of siderophore group nonribosomal peptides	7	12977	80	193896	0.287613
map00650	Butanoate metabolism	163	12977	2331	193896	0.291298
map01052	Type I polyketide structures	1	12977	5	193896	0.292747
map01503	Cationic antimicrobial peptide (CAMP) resistance	71	12977	994	193896	0.301824
map00592	alpha-Linolenic acid metabolism	3	12977	29	193896	0.306655
map00281	Geraniol degradation	7	12977	83	193896	0.320064
map01120	Microbial metabolism in diverse environments	1099	12977	16203	193896	0.320895
map01059	Biosynthesis of enediyne antibiotics	1	12977	6	193896	0.340083
map00710	Carbon fixation in photosynthetic organisms	2	12977	18	193896	0.341554
map01100	Metabolic pathways	4199	12977	62421	193896	0.342514
map00785	Lipoic acid metabolism	7	12977	86	193896	0.353082
map00640	Propanoate metabolism	149	12977	2161	193896	0.364759
map01057	Biosynthesis of type II polyketide products	1	12977	7	193896	0.384251
map00511	Other glycan degradation	94	12977	1361	193896	0.390937
map05150	Staphylococcus aureus infection	3	12977	34	193896	0.399956
map00970	Aminoacyl-tRNA biosynthesis	291	12977	4284	193896	0.404439
map00410	beta-Alanine metabolism	22	12977	309	193896	0.413608
map00350	Tyrosine metabolism	50	12977	720	193896	0.414268
map00660	C5-Branched dibasic acid metabolism	66	12977	958	193896	0.421842
map00290	Valine, leucine and isoleucine biosynthesis	112	12977	1640	193896	0.426153
map00790	Folate biosynthesis	97	12977	1420	193896	0.432239
map00625	Chloroalkane and chloroalkene degradation	39	12977	566	193896	0.449004
map00261	Monobactam biosynthesis	42	12977	611	193896	0.451649
map00622	Xylene degradation	3	12977	37	193896	0.454341
map00623	Toluene degradation	1	12977	9	193896	0.463917
map00770	Pantothenate and CoA biosynthesis	103	12977	1523	193896	0.470833
map00430	Taurine and hypotaurine metabolism	28	12977	409	193896	0.478613
map00020	Citrate cycle (TCA cycle)	120	12977	1785	193896	0.493318
map00270	Cysteine and methionine metabolism	244	12977	3638	193896	0.495824
map00364	Fluorobenzoate degradation	1	12977	10	193896	0.499797
map00626	Naphthalene degradation	31	12977	459	193896	0.505637
map01220	Degradation of aromatic compounds	58	12977	872	193896	0.538901
map00903	Limonene and pinene degradation	6	12977	89	193896	0.552732
map03430	Mismatch repair	176	12977	2652	193896	0.55769
map00900	Terpenoid backbone biosynthesis	82	12977	1241	193896	0.564208
map00360	Phenylalanine metabolism	41	12977	625	193896	0.575754
map00061	Fatty acid biosynthesis	98	12977	1490	193896	0.585966
map00195	Photosynthesis	3	12977	45	193896	0.587297
not applicable	Not applicable	6493	12977	97190	193896	0.587719
map00400	Phenylalanine, tyrosine and tryptophan biosynthesis	126	12977	1919	193896	0.601509
map00332	Carbapenem biosynthesis	12	12977	188	193896	0.609169
map03020	RNA polymerase	49	12977	757	193896	0.616536
map00051	Fructose and mannose metabolism	153	12977	2334	193896	0.617308
map02024	Quorum sensing	334	12977	5073	193896	0.631587
map00750	Vitamin B6 metabolism	31	12977	486	193896	0.63513
map02010	ABC transporters	533	12977	8079	193896	0.643603
map00740	Riboflavin metabolism	65	12977	1012	193896	0.65258
map01502	Vancomycin resistance	66	12977	1028	193896	0.654759
map01240	Biosynthesis of cofactors	747	12977	11310	193896	0.655834
map00620	Pyruvate metabolism	248	12977	3793	193896	0.658937
S Unigene number, significant unigene number; TS Unigene number, total significant unigene number; B Unigene number, background unigene number; TB Unigene number, total background unigene number.
